## Using Photovoice to explore HIV self-testing and secondary distribution of HIV self-testing among gay, bisexual and other men who have sex with men in China

Qianyun Wang<sup>1,2¶</sup>, Ying Lu<sup>1¶</sup>, Yuxin Ni<sup>1,3¶</sup>, Xumeng Yan<sup>1,4</sup>, Rayner Kay Jin Tan<sup>1,5</sup>, Dan Wu<sup>6</sup>, Joseph D Tucker<sup>1,7,8</sup>, Jason J Ong<sup>7,9</sup>, Weiming Tang<sup>1,10\*</sup>

1. University of North Carolina at Chapel Hill Project-China, Guangzhou, China
2. Department of Social Welfare, University of California, Los Angeles, CA, USA
3. Department of Health Law, Policy, and Management, Boston University, Boston, MA, USA
4. Department of Community Health Sciences, University of California, Los Angeles, CA, USA
5. Saw Swee Hock School of Public Health, National University of Singapore, Singapore
6. Department of Social Medicine & Health Education, Nanjing Medical University, Nanjing, China
7. Department of Clinical Research, Faculty of Infectious and Tropical Diseases, London School of Hygiene and Tropical Medicine, London, GB
8. Department of Medicine, University of North Carolina at Chapel Hill, Chapel Hill, North Carolina, USA
9. Central Clinical School, Monash University, Melbourne, Victoria, Australia
10. Dermatology Hospital, Southern Medical University, Guangzhou, China

\*Corresponding author

Email: [Weiming\\_tang@med.unc.edu](mailto:Weiming_tang@med.unc.edu)

¶These authors contributed equally to this work.

## Abstract

**Background:** Human immunodeficiency virus self-testing (HIVST) has been globally recognized as a useful and reliable strategy to promote HIV testing, especially among marginalized populations. In order to improve the understanding of HIVST uptake of the test users, notably gay, bisexual and other men who have sex with men (GBMSM) in China, this study aims to qualitatively explore the HIVST uptake experiences among this population.

**Methods:** The study employed Photovoice methodology, theoretically built on documentary photography and critical consciousness, to explore the experiences of HIVST and secondary distribution among GBMSM in China. Participants created photos and citations and shared and discussed them in the group. Three focus groups and one follow-up interview were held virtually for each participant who were self-identified as gay or bisexual and used a self-test kit before.

**Results:** This program recruited 22 participants from all throughout China. The findings revealed that systemic discrimination based on gay identification and AIDS-phobia both inside and outside the gay community, affected participants' decision to take HIVST and to pass HIVST kits on to others. Participants utilized HIVST on a routine basis, citing sexual health concerns, psychological comfort, and a responsibility to their significant others as reasons for doing so.

HIVST kit *distribution within intimacy*, and *the significant role of gay-led community-based organizations* were found as characteristics of interactions between participants and those who they passed HIVST kit(s) on to. There were observed both facilitators and barriers to HIVST uptake and/or secondary distribution in this demographic.

## Conclusion:

In the study, images and narratives were acquired through empowering GBMSM and promoting their community engagement to underline the necessity for measures and policies on promoting HIVST among this population. Findings also entailed the need to create a more inclusive society for sexual minorities and people living with HIV. Implications for promoting HIVST secondary distribution and limitations and strengths of the pioneer photovoice study among GBMSM in China were also listed.

## Key words

*Photovoice; HIV self-testing; Secondary Distribution; GBMSM; China*

## Introduction

HIV self-testing (HIVST) has been widely acknowledged as an innovative and reliable method for increasing HIV testing. [1] The World Health Organization (WHO) promotes HIVST as a successful testing strategy, especially for key populations, such gay, bisexual and other men who have sex with men (GBMSM), since it provides better convenience, autonomy, and privacy for test users [2]. In China, despite the high demand for HIVST among GBMSM, previous studies have noted obstacles, including safety, coerced testing, and legality [3], and thus the voice of the end users are essential for planning more sustainable HIVST programs.

The practice of sharing HIVST with others in one's social network is known as secondary distribution of HIVST (SD-HIVST) [4]. Two studies in China indicated that SD-HIVST among GBMSM can be aided by integrating social media, monetary incentives and peer referral [5,6].

A few qualitative studies have investigated HIVST experiences among GBMSM in China. For example, it was discovered that HIVST empowered GBMSM and informed sexual decision-making, based on qualitative data collected from interviews with 42 GBMSM and 6 stakeholders. [7]. A recent study conducted in-depth interviews with 22 GBMSM who had participated in secondary distribution of HIVST in southern China, and found the facilitators and barriers to HIVST use for this population [8].

While more studies have begun to focus on HIVST and SD-HIVST among GBMSM in China, there has not been research using qualitative methods to dig deeper into issues like how social interaction and/or cultural norms may affect GBMSM's decisions regarding HIVST and SD-HIVST or employing a participatory action research (PAR) tool to engaging GBMSM for the outcomes with their both collective and self-reflective voices.

23 Photovoice, a community-based PAR approach, has been viewed as a technique for  
24 empowering disadvantaged people in which participants utilize a combination of photography  
25 and critical discussion to highlight their community's issues and demands for social change [9].  
26 Photovoice has been used in a rising number of studies to enable community dialogue and  
27 advocacy in the fields of health and public health, with a focus on people living with HIV  
28 (PLWH) [10–12].

29 This study aims to fill the gap by using Photovoice method to qualitatively explore the  
30 experiences on HIVST and secondary distribution of HIVST from the perspective of GBMSM in  
31 China. Through the process, we intent to inform understandings, as well as collective and self-  
32 reflective voices from the GBMSM community. This study will answer the questions:

- 33 1) What are the GBMSM's own awareness of and/or attitude towards HIV/AIDS and  
34 HIVST?
- 35 2) What are the characteristics of interacting relations between index participants and alters  
36 during HIVST secondary distribution?

### 37 **The Theoretical Framework**

38 Photovoice methodology is theoretically built on documentary photography, feminist  
39 theory, and critical consciousness. Documentary photography aims to use visual narratives to  
40 capture the social lives of a specific group of people in time and space, and Documentary  
41 photographers always concern about social equity and use comprehensive content to help raise  
42 social awareness and make a difference [13,14].

43 The principles of feminist theory lie in that the personal is political and no one is better to  
44 study and understand the issues of a group than the people within the group [15]. Although this  
45 theory was developed as a response to women's social experience, its principles are also

46 applicable to others [12]. In many cases in China, the lack of GBMSM's uncovered experiences  
47 lies in their marginalized political identity as gay men. In this study, participants were believed  
48 to identify their community issues and needs, such as their experiences of conducting and  
49 distributing HIVST, from their perspective.

50 Critical Consciousness is grounded where community involvement can lead to social  
51 change and social equity, and it encourages community residents to have critical group dialogue  
52 in order to foster critical understanding and action for community change [16,17].

## 53 **Methodology**

### 54 **Ethics**

55 We registered this trial on the Chinese Clinical Trial Registry website  
56 (ChiCTR2000039632). This study received Institutional Review Board approval from the  
57 Dermatology Hospital of Southern Medical University (2019020[R3]). Oral consent was  
58 obtained from all participants. In anticipation of the inaugural virtual focus group session, each  
59 participant was furnished with an electronic consent form well in advance. This facilitated ample  
60 opportunity for them to comprehensively peruse the associated content. Should they express their  
61 willingness to partake in the proceedings, a designated ZOOM meeting link was provided,  
62 enabling their presence at the inaugural focus group session. Commencing the inception of this  
63 session, the researcher reiterated the contents of the consent form, subsequently inquiring into  
64 the participants' continued willingness to engage in the program, with participation proceeding  
65 for those who chose to remain within the group.

### 66 **Recruitment**

67 The study conducted from June to August, 2021, was part of a quasi-experimental trial  
68 which explored the effectiveness of sexual health influencers identified by an ensemble machine

69 learning model in promoting SD-HIVST among GBMSM in China [18]. The Social  
70 Entrepreneurship to Spur Health team, the Zhuhai Center for Disease Control and Prevention,  
71 and the Zhuhai Xutong Voluntary Services Center, a GBMSM community-based organization  
72 (CBO), collaborated in this study.

73 The recruitment criteria for this photovoice are: 1) 18 years and above; 2) was assigned  
74 male at birth; 3) ever had sex with men; 4) ever conducted HIVST; 5) ever distributed HIVST or  
75 was planned to do so; 6) have a device (e.g., mobile phone) to take photos and know how to use  
76 it. In this study, GBMSM from different cities in China virtually gather to share experiences and  
77 thoughts as a process of community participation. Individuals were excluded if they were unable  
78 to attend three focus group discussions or take a follow-up interview. An incentive of RMB 150  
79 (USD 20) was provided to each participant in three equal portions in the first, second, and third  
80 focus group.

### 81 **Sampling**

82 Purposive sampling was used to recruit participants. One participant was recruited by  
83 snowballing. He was informed with this project by another participant, his friend. He approached  
84 the research team and expressed his willingness to participate in the project. After examining that  
85 he met all the recruitment criteria for participation, the research team confirmed his participation.

### 86 **Data Generation**

87 Each focus group discussion section was co-facilitated, once a week, by three research  
88 assistants from SESH team. The study procedures are presented in Figure 1.

89 (INSERT Figure 1 HERE).

90 The first focus group aimed at discussing the goal of the study, the introduction of  
91 Photovoice procedure, and ethics of photography. In the first focus group, participants filled in a

92 demographic survey. This questionnaire only collected overall profiles, each data could not be  
93 matched to an individual) and were asked to take three to five photos to answer the following  
94 questions: “*What are the phenomena related to HIV/AIDS in life?*”; “*How do you feel about*  
95 *HIV self-testing? What is your take on it, your attitude toward it, or your experience with it?*”.

96 Participants shared and explained their images and captions during the second focus  
97 group, which took place one week later. After the group discussion in the second focus group,  
98 participants were then instructed to take three to five more images in order to respond to the  
99 following questions: "What are your ideas, feelings, and experiences with secondary HIV self-  
100 testing?"; "Please explain the person or scenario to whom you provide the HIV self-test kit(s),"   
101 which were presented and interpreted in the third session after another week.

## 102 **Data Analysis**

103 Each group discussion was audio-recorded and transcribed. Photos were collected as  
104 visual data. The research team reached preliminary results with the strategy proposed by Tsang  
105 [19]. The results were shared with participants individually during the follow-up interviews,  
106 which were also recorded. A four-step Photovoice data analysis strategy proposed by Tsang [19]  
107 was used, as follows:

108 1) Photograph Analysis Based on the Researcher's Interpretations: In step 1, a  
109 preliminary explanation of the phenomenon was created by the study team after conducting an  
110 initial analysis of the photographs. We divided them into categories and looked at each one in  
111 detail, then divided them again and looked at the categories again until saturation was reached.

112 2) Photograph Analysis Based on the Participants' Interpretations: Following a  
113 preliminary examination of the photographs and the development of the researcher's explanation,  
114 we discovered whether there were any other possible explanations for the photographs based on

115 the participants' interpretations. Therefore, we examined the photographs' descriptions and as  
116 well as the data from the focus group discussions.

117 3) Cross-comparison: Then, in order to develop an integrative explanation of the  
118 phenomenon based on the researcher's interpretation and that of the participants, we compared  
119 photographs in terms of content, narratives, themes and others.

120 4) Theorization: Last, we generated narrative and visual representations and explanations  
121 of the phenomenon based on the analysis from the cross-comparison.

122 Participants' meanings were verified using narrative data from follow-up interviews by  
123 one researcher. Each of these factors are described with illustrations drawn from the transcripts  
124 of focus group discussion and photos with captions, denoted by participants' pseudonym. All  
125 names mentioned in this paper are pseudonyms.

## 126 **Results**

127 This study recruited 22 participants from 5 provinces in China. The ages of the  
128 participants ranged from 19 to 50, with an average of 28 years old. Eighteen individuals (82%)  
129 self-identified participants self-identified as gay, three (14%) said they were bisexual, and one  
130 (4%) reported not sure or did not want to share. These specific identifying details were gathered  
131 without being linked with any particular participant.

132 Findings highlights the stigma and discrimination connected to HIV and HIVST within  
133 and outside of the community of GBMSM, HIVST as a daily-routine behavior among  
134 participants, interactional characteristics during HIVST secondary distribution.

## 135 **Stigma and Discrimination Connected to HIV**



136 During the focus groups, stigma and discrimination towards HIV was heavily discussed, and  
137 some participants offered photos and captions reflecting their views toward and/or understanding  
138 of HIV.

### 139 ***Social Stigma in HIV Attached to the Gay Identity***

140 For example, Stephen described how he felt about the HIV stigma associated with his  
141 identity, stating, as a sexual minority:

142 “We [as gays] often suffer from two diseases [stigma] at the same time - sexual  
143 metamorphosis and HIV. Homosexuality and HIV [status] are ‘covered up’ in reality.  
144 Society wants us, and we sometimes want, to hide.”

145 (INSERT Image and Caption 1 HERE)

146 In the set of two photos of Stephen’s roommate’s blood donation certificate, Stephen shared  
147 his concerns that he would never be accepted to donate blood as gay. Officially, male gays are  
148 not permitted to donate blood in China. However, because Chinese sexual minority identities are  
149 frequently hidden, this formal law has not been implemented. As a result, it represents China's  
150 systemic stigma towards the community of GBMSM.

151 (INSERT Image and Caption 2 HERE)

### 152 ***“AIDS” Phobia within the Gay Community***

153 Many of the participants' stories revealed their fear of HIV. Participants in several situations  
154 voiced their irrational fear of contracting HIV. Xiao Li, for example, when discussing gays’  
155 “AIDS” phobia, which is termed as “Kong Ai” in Chinese, said:

156 “Some people [gays] will be so afraid, that is, they feel they are infected with HIV, but they  
157 are not. Then they will always feel they are, always be afraid, and then [mentally] worse than  
158 those who are actually living with HIV.”

159 Particularly, Pando pointed out that his “AIDS” phobia might have contributed to his use of  
160 HIVST, as he quoted:

161 “To be honest, I think I should also be one of those who fear AIDS. I often do HIV [self]  
162 testing. I pay great attention to this kind of things [HIVST].”

### 163 *Personal Transformative Development on Anti-Discrimination in HIV*

164 Although mixed with the fear of getting infected with HIV and perceived discrimination in  
165 HIV targeting gays, updated concepts related to HIV were included in focus groups; for instance,  
166 “U=U” (Undetectable equals Untransmutable) was advocated by some participants.

167 Some also presented their personal transformative development on anti-discrimination in  
168 HIV. They shared that the friendship with other gay friends who were living with HIV helped  
169 them dispel the myths about HIV:

170 (INSERT Image and Caption 3 HERE)

171 Additionally, Lao Wang shared that HIV-related education and knowledge transferred his  
172 understanding of HIV which was shaped in his childhood:

173 “The generation like my mother’s say it [AIDS] is a terrible disease. Don’t have meals or live  
174 with people living with HIV. My mother spoon-fed me with that concept. Well, then, when I  
175 went to college, I began to know some knowledge given by our school and some lectures  
176 about sexual health. In fact, it was not that terrible.”

177 Specifically, one participant, Ririyeye, summarized three stages of understanding HIV  
178 among gays, from a developmental perspective:

179 “1<sup>st</sup>: People are ignorant of HIV. Though there are only a variety of news and reports on HIV  
180 cases, HIV is perceived to be far away from daily life.

181 2<sup>nd</sup> : Fear emerges when it comes to HIV. After an ignorant stage, people believe HIV is the  
182 most terrible disease, where daily contact will lead to infection. HIV is impossible to prevent,  
183 and with no medicine to cure it, even people living with HIV die young.

184 3<sup>rd</sup> : HIV has been simplified [normalized]. HIVST kits are accessible. There is PrEP for  
185 early prevention, PEP for blocking, and medical adherence can also lead to a normal life.”

### 186 **HIV Self-Testing as Routine**

187 Participants shared that they utilized HIVST on a routine basis, citing sexual health  
188 concerns, psychological comfort, and a responsibility to their significant others as reasons for  
189 doing so.

### 190 ***Sexual-Health-Oriented Decision***

191 Almost all participants agreed that their decision to use HIVST was based on sexual  
192 health. They identified the significance of knowing one’s own HIV-status, for a better linkage to  
193 care if necessary. In that way, HIVST served them well due to the greater convenience,  
194 autonomy and privacy it offered.

195 (INSERT Image and Caption 4 HERE)

196 Further, Qingfeng said HIVST became a part of his daily life:

197 “Now I’m applying for HIVST from [name of a community-based organization (CBO)],  
198 and it is free. I apply for it every month. Self-testing has become a part of life.”

### 199 ***Psychological Comfort***

200 It was also expressed that HIVST sometimes was served for psychological comfort by  
201 several participants. As Caihong explained,

202 “Personally, I may have sex no more than twice a year. So, it [HIVST] is more out of  
203 curiosity than the test results.”

204 Furthermore, Ririyeve stated that regular self-testing might help alleviate his “AIDS” phobia by  
205 confirming his negative status on a regular basis. As his work presented,

206 (INSERT Image and Caption 5 HERE)

### 207 ***Moral Duty for Oneself and Others***

208 It was discovered that taking HIVST on a regular basis was also motivated by moral  
209 obligation, both for oneself and for others, such as family and friends.

210 "It is responsible for family and friends to take regular self-testing," Carey Zhang, for  
211 example, said. And he further explained,

212 "If you take medicine in time [after being tested positive] well, you can ensure your life span  
213 and your quality of life are of no different from those of normal people. Therefore, in that  
214 way, I think, to ensure my quality of life and living condition is to be responsible for my  
215 family and friends."

### 216 **Interactional Characteristics during SD-HIVST**

#### 217 ***A Collective Sense of the Gay Community***

218 When some participants described their understanding of HIVST and SD-HIVST in the  
219 gay community, they provided a collective sense where they felt all the residents were connected  
220 with each other in terms of sexual health, like the underground tree roots, or stars in a galaxy.

221 Promoting HIVST uptake in the community is beneficial to everyone.

222 (INSERT Image and Caption 6 HERE)

223 Further, Stephen pointed out how he expected HIVST promotion in the community to help  
224 eliminate the systematic discrimination against the gay population:

225 “It is hoped that through promoting HIVST uptake, the HIV pandemic can be better  
226 controlled, and discrimination and stigmatization [related to HIV against gays] can be  
227 eliminated gradually”.

228 Similarly, participants distributed HIVST kits, in many cases, to those who were also from the  
229 gay community. And they viewed their reciprocal relations as a prominent factor for the self-  
230 driven distribution:

231 “HIVST secondary distribution is voluntary, reproducible and transmissible. The stars  
232 can light up the sky, when all come together; it turns out to be a galaxy of group  
233 immunity.” **By Qian**

#### 234 *‘More Than just Online Friends’: Necessary Face-to-Face Interaction*

235 Almost all the participants agreed that the gay dating app was an important approach for  
236 them to develop their networks for friendship and/or intimacy among this population. Namely,  
237 their social networks with other gays have an internet-based connected face. Furthermore,  
238 convenient shipping systems in China enable online secondary distribution. However, when it  
239 came to the persons whose participants distributed HIVST to, participants usually prioritized  
240 those who had face-to-face interactions with them before, such as gay friends whom they met in  
241 a CBO, schoolmates, and sexual partners, among others.

242 For example, Stephen shared a smart phone screenshot where he had a chat with an online  
243 gay friend in which he was attempting to send out an invitation of online application for HIVST  
244 but failed. However, he then offered the invitation to a schoolmate. HIVST distribution, he  
245 argued, should be based on trust, which he said could not be guaranteed by just online pals.

246 (INSERT Image and Caption 7 HERE)

247 Many other participants were able to relate to Stephen’s experiences with HIVST distribution.

248 As Haiqing explained as followed:

249 “The reason why I didn't pass it [HIVST kits] [to the online friends] is that I didn’t know  
250 where their boundary was. If I was not familiar with them enough, I would be so  
251 embarrassed [to start a HIVST distribution conversation].”

252 This occurrence was linked by some participants to HIV stigma and/or AIDS fear, which was  
253 prevalent in the gay community.

254 “I think to conduct a distribution is difficult [among gays]. Some gays will be just afraid  
255 of HIV testing, especially those who had high-risk sexual behaviors.” **By Lao Wang**

256 “[If I want to pass the kit to an internet person], he will wonder why I want to pass this  
257 thing to him.....It's possible that he thinks you have bad intentions. Your motivation to  
258 trigger this invitation is embarrassing. He might assume that you think he is ill [HIV  
259 positive].” **By Pando**

### 260 *HIVST Secondary Distribution with Intimacy*

261 Specifically, some participants shared they passed HIVST kits to sexual partners. It was  
262 common that distribution happened right before their sex.

263 “I would for sure ask him [the sexual partner] to self-test [right there]. Of course, safe sex  
264 must be taken. If we still have a connection after sex, I would certainly like to pass  
265 [online] distribution to him. From my point of view, I can also take a test, which can also  
266 indirectly prove that our previous sex was safe.” **by Pando**

267 Lichee presented his experiences of HIVST and secondary distribution to his boyfriend  
268 when they were just committed to their romantic relationship. He thought it was fair to know  
269 each other’s health status at the beginning.

270 (INSERT Image and Caption 8 HERE)

271 “Then I told him about the test, but he questioned whether I thought he was hooking up  
272 or cheating. But in fact, after I explained to him later, he also agreed [to have HIVST  
273 with me].” **By Lichee**

#### 274 *The Significant Role of GBMSM-Led CBO*

275 GBMSM-led CBO were described as a platform for interaction in the gay community.  
276 Not only did participants receive services and information from GBMSM-led CBOs, where they  
277 presented that they got HIV prevention knowledges, counseling services, free HIVST, etc. For  
278 instance, Wind commented that he accessed free HIVST kits from a CBO, and it had become a  
279 regular event:

280 “I now apply for HIVST kits [from a CBO]. They are free. I apply every month [and do  
281 self-test] as a part of my life, a fixed part. Now I keep my mind to do self-tests.” **By**  
282 **Wind.**

283 “It let me know that volunteers [from GBMSM-Led CBO] are empathetic and passionate  
284 about promoting of HIV prevention knowledges, which has effectively increased my  
285 understanding.” **By Xiao Li.**

286 Also, some participants were working as volunteers and full-time employers in CBOs,  
287 and they had been involved in HIVST and/or other sexual health-related promotion work.

288 (INSERT Image and Caption 9 HERE)

289 Xiao Zhi, a full-time staff working in a GBMSM-Led CBO, shared his experience:

290 “We regularly organize HIV-related knowledge training among high school students,  
291 college students and other youths, including HIVST kit training. So that we can better  
292 understand this group [male gay community], understand HIV, [the way to] protect

293 ourselves.....Our goal is to improve the awareness of self-protection, know and  
294 understand AIDS, not fear AIDS, and strengthen sexual minorities.”

295 GBMSM-led CBOs efficiently promote HIVST uptake among GBMSM and become an  
296 engaging platform where they could have community participation through volunteering and  
297 working with payment.

## 298 **Discussion and Implication**

299 Our discussion and implication include 1) stigma and discrimination working as an  
300 essential barrier of HIVST as well as secondary distribution, 2) the individual factors  
301 contributing to usage of HIVST, while the collective factors contributing to secondary  
302 distribution, and 3) strengths and limitations of this Photovoice project on GBMSM in China.

### 303 **Stigma and Discrimination affecting HIVST and Secondary Distribution**

304 We found that stigma and discrimination related to HIV/AIDS and gay identity would  
305 influence Chinese GBMSM’s HIVST behaviors directly and indirectly. GBMSM discussed how  
306 they felt stigmatized as a sexual minority in terms of HIV/AIDS by other individuals. By  
307 unleashing the fear of HIV/AIDS infection, focus groups frequently expressed “AIDS” phobia.  
308 Certain participants spoke of the mental load associated with the possibility of acquiring  
309 HIV/AIDS. Excessive HIVST uptake may be a behavioral reflection of this mental anxiety,  
310 which might encourage excessive and unnecessary HIVST behaviors among this population.

311 Stigma and discrimination connected to HIV have been found linked to an increase in risk-  
312 taking behavior and a decline in effective HIV prevention and testing among these males [20].  
313 According to US studies, GBMSM who internalized stigma as gay men as were less likely to  
314 conduct HIV testing and more likely to take sexual risk behaviors [21,22]. However, previous  
315 research, which examined the relationship between stigma and discrimination and HIV testing



316 behaviors, did not specifically address HIVST. Further research should concentrate on exploring  
317 elements impacting this population's mental health, particularly, stigma and discrimination  
318 linked to HIV/AIDS and gay identity, and how these could further effect HIVST behaviors.  
319 Stigma and discrimination connected to HIV have been found linked to an increase in risk-taking  
320 behavior and a decline in effective HIV prevention and testing among these males [20].  
321 According to US studies, GBMSM who internalized stigma as gay men were less likely to  
322 conduct HIV testing and more likely to take sexual risk behaviors [21,22]. However, previous  
323 research, which examined the relationship between stigma and discrimination and HIV testing  
324 behaviors, did not specifically address HIVST. Further research should concentrate on exploring  
325 elements impacting this population's mental health, particularly, stigma and discrimination  
326 linked to HIV/AIDS and gay identity, and how these could further affect HIVST behaviors.

327 The study also found that stigma linked to HIV/AIDS and “AIDS” phobia among GBMSM  
328 could affect HIVST secondary distribution, and the persons to who they distributed HIVST kits.  
329 In the study, it was common that HIVST secondary distribution happened between sexual  
330 partners right before their sex. However, due to participants’ stigma around HIV/AIDS, it might  
331 also be unsettling to ask sexual partners to conduct HIVST. Despite the heavy use of online  
332 dating apps and other social networks, and the accessible HIVST online delivery services,  
333 participants still disagreed that online networks could facilitate SD-HIVST. Considering trust  
334 issues and a fear of being stigmatized associated with HIV/AIDS, even if they had extra kits,  
335 some GBMSM said that it was challenging for them to start an online conversation about HIVST  
336 kit distribution; instead, they placed more importance on giving out kits to reliable individuals,  
337 including friends with whom they engaged offline. Secondary distribution of HIVST might be  
338 hampered by “AIDS” phobia and stigma among GBMSM, both through online and on-site social

339 networks. From a social network perspective, further research should explore how stigma and  
340 discrimination around HIV/AIDS among GBMSM can influence their behavior of HIVST and  
341 secondary distribution.

342 In the study, participants' transformational anti “AIDS” phobia development experiences  
343 were uncovered. They shared that they benefited from their social network in the process of  
344 eradicating the stigma associated with HIV and AIDS and in learning new information about  
345 HIV prevention. Furthermore, HIV stigma reduction efforts should engage various public sectors  
346 in addition to relying on one's personal network. A study from Ghana modified HIV stigma  
347 reduction training for GBMSM using a mixed methods approach. They discovered that  
348 addressing HIV and other intersectional stigmas related to sexual and gender diversity was the  
349 fundamental condition for eradicating stigma [23]. The outcomes are consistent with our findings  
350 that GBMSM experienced many forms of stigma, such as those related to HIV and homosexual  
351 identity. The application of HIV stigma elimination in practice should be improved by future  
352 research.

### 353 **Individual and Collective Factors for HIVST and Secondary Distribution**

354 Most participants mentioned that because of the convenience and privacy it offered, self-  
355 testing has become a regular health check habit. Other than China, a few studies also found  
356 similar feedback from GBMSM that HIVST novel characters other than facility-based testing  
357 contributed to more HIV testing. According to focus group discussions (FGDs) conducted in  
358 Uganda with 74 GBMSM and 18 health workers, GBMSM preferred HIVST to facility-based  
359 HIV testing procedures because of its convenience and confidentiality [24]. Another study from  
360 the UK used focus group discussions among 47 GBMSM and found that the convenience of use

361 and confidentiality of HIVST led to testing. However, there were also issues raised about the  
362 window period, overly complicated HIVST kits, and other factors [25].

363 In comparison to the facility-based method, the HIVST safeguards individual sense to a  
364 larger extent, namely “the right to privacy” [26]. Most participants who discussed their own  
365 usage of HIVST said that because of the convenience and privacy it offered, self-testing has  
366 become a regular health check habit. In comparison to the facility-based method, the HIVST  
367 safeguards individual sense to a larger extent, namely “the right to privacy” [26].

368 While HIVST has been credited with defending “the right to privacy” for self-testing  
369 individuals, it has also highlighted secondary distribution as one of the most efficient means of  
370 promoting HIVST [27]. At this point, the collective sense may thus be crucial. For instance,  
371 several participants in the study identified as belonging to the community [of gay men], and they  
372 thought that when HIVST and secondary distribution was collectively practiced in the  
373 community, it would promote community health and help community members overcome the  
374 stigma associated with AIDS.

375 The roles of both individual and collective cultural symbols in GBMSM HIV testing  
376 were examined in a study conducted in the Philippines [28]. Filipino GBMSM collective culture  
377 shared inside and outside the GBMSM community, including family, religious communities,  
378 helped the population cope with HIV, depression connected to HIV, stigma, and other issues. Yet,  
379 the study in the Philippines was unable to explore how individual and collective cultures would  
380 affect HIVST and secondary distribution. Our study added to the gap by finding that while  
381 HIVST was mostly driven by the individual sense, secondary distribution of HIVST was usually  
382 motivated by the collective sense. We also observed an association between HIVST and the  
383 collective sense, as some participants claimed that knowing their own HIV status—as confirmed

384 by HIVST—also made them feel responsible for their friends and family. Even yet, the study in  
385 the Philippines was unable to explore how individual and collective cultures would affect  
386 specifically HIVST and secondary distribution.

387 Furthermore, although HIVST maximized privacy for GBMSM to have HIV testing, the  
388 study indicated that community participation encouraged GBMSM to use HIVST as well as  
389 secondary distribution. GBMSM-led CBO played an essential role, whereby taking part in  
390 collective events, GBMSM were informed about HIVST and given access to HIVST kits. In  
391 return, some GBMSM also volunteered to promote HIVST and HIV prevention knowledge in the  
392 organizations. Secondary distribution happened in a community level. Community-based  
393 approaches have been recognized as effective involvement of HIVST promotion, as various  
394 stakeholders together reached community engagement [29,30]. Public sectors and academia should  
395 work closely with community-based organizations, when involving with GBMSM for HIV  
396 prevention. Furthermore, although HIVST maximized privacy for GBMSM to have HIV testing,  
397 the study indicated that community participation encouraged GBMSM to use HIVST. GBMSM-  
398 led community-based organizations played an essential role, whereby taking part in collective  
399 events, GBMSM were informed about HIVST and given access to HIVST kits. In return, some  
400 GBMSM also volunteered to promote HIVST and HIV prevention knowledge in the  
401 organizations. Community-based approaches have been recognized as effective involvement in  
402 HIVST promotion, as various stakeholders together reached community engagement [29,30].  
403 Public sectors and academia should work closely with community-based organizations, when  
404 involved with GBMSM for HIV prevention.

405 To more properly promote HIVST usage and secondary distribution, we need to pay  
406 attention to the function of individual and collective senses, which could be balanced and

407 complementary. Researchers or other public health sectors may carry out more research in the  
408 area.

### 409 **Strengths and Limitations**

410 This study is an innovative use of Photovoice in the GBMSM community in China. First  
411 off, the community does not widely employ Photovoice approach. During recruiting, the  
412 researchers spent a significant amount of time explaining photovoice and fielding numerous  
413 inquiries from community members who were interested. Recruitment and participation might be  
414 difficult due to participants' unfamiliarity with the activity approach, but this is a fantastic  
415 example of experimenting. Nearly all respondents to the follow-up survey said that they would  
416 want to see and participate more community-based PAR programs.

417 Secondly, it's important to note that this Photovoice project was exclusively performed  
418 online because to the COVID epidemic restriction, making it more inclusive in time and space  
419 and attracting a diversity of participants in terms of age and geographic location. However, there  
420 were stricter guidelines for participants' usage and accessibility of technological devices.  
421 Additionally, digital elements endured throughout the project, e.g., some participants would  
422 directly reply to an interactive scenario in the submitted photos by taking screenshots of their  
423 mobile phone conversations, etc. An online photographic exhibition was also planned in order to  
424 increase the impact of the research findings. The limitations and benefits of digital PAR should  
425 also be further studied in future study.

426 Many empowering events occurred throughout the participants' exploration, such as the  
427 participants' own definition of the inequalities and the systemic exclusion they personally  
428 experienced related to their sexual minorities identity, asking for the eradication of such from all  
429 spheres. Some participants also shared more updated HIV prevention messages, e.g., U=U, to

430 dispel the overwhelming fear of HIV and AIDS among others in the group. Nearly all  
431 participants in the event reported, in the follow-up survey, gaining new meaningful knowledge.  
432 Photovoice enables participants themselves address the issues they confront as community  
433 members. As a discursively excluded minority in Chinese society, GBMSM ought to have more  
434 chances to speak up for their communities and themselves.

435         The cycle period for this Photovoice project was relatively short. Within a week, each  
436 participant was asked to contribute photographic images and citations in response to several  
437 themes, which were then shared with the group. Some claimed that they were so hurried that they  
438 did not share their work on time. An extended project cycle may ensure participants' perception  
439 of involvement and experience.

#### 440 **Data Availability Statement**

441         The data that support the findings of this study are available on request from the  
442 corresponding author, Weiming Tang. The data are not publicly available due to ethical  
443 restrictions and privacy concerns, as they contain potentially sensitive information that could  
444 compromise the privacy of research participants.

#### 445 **Funding Statement**

446         This research was supported by the Key Technologies Research and Development  
447 Program (2022YFC2304900-4 to WT), and CRDF Global (G-20210467775 to WT).

#### 448 **Conflict of Interest Statement**

449         The authors declare no conflicts of interest.

450

451

## References

- 452 1. Joint United Nations Programme on HIV/AIDS. Fast-Track - Ending the AIDS epidemic by  
453 2030. [Internet]. Geneva; 2016 May. Available from:  
454 [http://www.unaids.org/en/resources/documents/2014/JC2686\\_WAD2014report](http://www.unaids.org/en/resources/documents/2014/JC2686_WAD2014report)
- 455 2. World Health Organization. Consolidated guidelines on HIV testing services [Internet]. 2019.  
456 Available from: <https://www.who.int/publications/i/item/978-92-4-155058-1>
- 457 3. Tang W, Wu D. Opportunities and challenges for HIV self-testing in China. *The Lancet HIV*.  
458 2018 Nov 1;5(11):e611–2.
- 459 4. Maman S, Murray KR, Mavedzenge SN, Oluoch L, Sijenje F, Agot K, et al. A qualitative  
460 study of secondary distribution of HIV self-test kits by female sex workers in Kenya. *PLOS*  
461 *ONE*. 2017 Mar 27;12(3):e0174629.
- 462 5. Wu D, Zhou Y, Yang N, Huang S, He X, Tucker J, et al. Social Media–Based Secondary  
463 Distribution of Human Immunodeficiency Virus/Syphilis Self-testing Among Chinese Men  
464 Who Have Sex with Men. *Clinical Infectious Diseases*. 2021 Oct 1;73(7):e2251–7.
- 465 6. Zhou Y, Lu Y, Ni Y, Wu D, He X, Ong J, et al. Monetary incentives and peer referral in  
466 promoting secondary distribution of HIV self-testing among men who have sex with men in  
467 China: A randomized controlled trial. *PLOS Medicine*. 2022 Feb 14;19:e1003928.
- 468 7. Liu F, Qin Y, Meng S, Zhang W, Tang W, Han L, et al. HIV self-testing among men who  
469 have sex with men in China: a qualitative implementation research study. *Journal of Virus*  
470 *Eradication*. 2019 Oct 1;5(4):220–4.
- 471 8. Sha Y, He X, Lu Y, Yang F, Tucker JD, Wu D, et al. “Just felt so convenient and warm by  
472 the non-profit help”. Optimizing HIV self-test secondary distribution among men who have  
473 sex with men in China. *AIDS Care*. 2022 Mar 14;0(0):1–6.
- 474 9. Sutton-Brown CA. *Photovoice: A Methodological Guide*. Photography and Culture. 2014  
475 Jul;7(2):169–85.
- 476 10. Catalani C, Minkler M. *Photovoice: A Review of the Literature in Health and Public Health*.  
477 *Health Educ Behav*. 2010 Jun;37(3):424–51.
- 478 11. Teti M, Kogler E, Conserve DF, Handler L, Bedford M. A Scoping Review of Photovoice  
479 Research Among People With HIV. *J Assoc Nurses AIDS Care*. 2018;29(4):504–27.
- 480 12. Wang C, Burris MA. *Photovoice: concept, methodology, and use for participatory needs*  
481 *assessment*. *Health Educ Behav*. 1997 Jun;24(3):369–87.
- 482 13. Strack RW, Magill C, McDonagh K. Engaging youth through photovoice. *Health Promot*  
483 *Pract*. 2004 Jan;5(1):49–58.

- 484 14. Wu J, Guoqiang Y. Beyond Propaganda, Aestheticism and Commercialism: The Coming of  
485 age of Documentary Photography in China. *Javnost - The Public*. 2007 Jan;14(3):31–48.
- 486 15. Keller EF, Longino HE, editors. *Feminism and science*. Oxford; New York: Oxford  
487 University Press; 1996. 289 p. (Oxford readings in feminism).
- 488 16. Carlson ED, Engebretson J, Chamberlain RM. Photovoice as a social process of critical  
489 consciousness. *Qual Health Res*. 2006 Jul;16(6):836–52.
- 490 17. Freire P, Freire P. *Education for critical consciousness*. 1. US pbk. ed. New York: Seabury  
491 Press; 1974. 164 p.
- 492 18. Lu Y, Ni Y, Wang Q, Jing F, Zhou Y, He X, et al. Effectiveness of sexual health influencers  
493 identified by an ensemble machine learning model in promoting secondary distribution of  
494 HIV self-testing among men who have sex with men in China: study protocol for a quasi-  
495 experimental trial. *BMC Public Health*. 2021 Dec;21(1):1772.
- 496 19. Tsang KK. Photovoice Data Analysis: Critical Approach, Phenomenological Approach, and  
497 Beyond. *Beijing Int Rev Educ*. 2020 Apr 3;2(1):136–52.
- 498 20. Smit PJ, Brady M, Carter M, Fernandes R, Lamore L, Meulbroek M, et al. HIV-related  
499 stigma within communities of gay men: a literature review. *AIDS Care*. 2012 Apr  
500 1;24(4):405–12.
- 501 21. Burnham KE, Cruess DG, Kalichman MO, Grebler T, Cherry C, Kalichman SC. Trauma  
502 symptoms, internalized stigma, social support, and sexual risk behavior among HIV-  
503 positive gay and bisexual MSM who have sought sex partners online. *AIDS Care*. 2016  
504 Mar 3;28(3):347–53.
- 505 22. Glick SN, Golden MR. Persistence of racial differences in attitudes toward homosexuality in  
506 the United States. *J Acquir Immune Defic Syndr*. 2010 Dec 1;55(4):516–23.
- 507 23. Nyblade L, Stockton MA, Saalim K, Rabiou Abu-Ba'are G, Clay S, Chonta M, et al. Using a  
508 mixed-methods approach to adapt an HIV stigma reduction to address intersectional stigma  
509 faced by men who have sex with men in Ghana. *Journal of the International AIDS Society*.  
510 2022;25(S1):e25908.
- 511 24. Okoboi S, Castelnuovo B, Moore DM, Musaazi J, Kambugu A, Birungi J, et al. Incidence  
512 rate of sexually transmitted infections among HIV infected patients on long-term ART in an  
513 urban and a rural clinic in Uganda. *BMC Public Health*. 2019 Jan 18;19(1):87.
- 514 25. Witzel TC, Rodger AJ, Burns FM, Rhodes T, Weatherburn P. HIV Self-Testing among Men  
515 Who Have Sex with Men (MSM) in the UK: A Qualitative Study of Barriers and  
516 Facilitators, Intervention Preferences and Perceived Impacts. *PLOS ONE*. 2016 Sep  
517 9;11(9):e0162713.
- 518 26. Johnson C, Baggaley R, Forsythe S, van Rooyen H, Ford N, Napierala Mavedzenge S, et al.  
519 Realizing the Potential for HIV Self-Testing. *AIDS Behav*. 2014 Jul 1;18(4):391–5.



- 520 27. Masters SH, Agot K, Obonyo B, Napierala Mavedzenge S, Maman S, Thirumurthy H.  
521 Promoting Partner Testing and Couples Testing through Secondary Distribution of HIV  
522 Self-Tests: A Randomized Clinical Trial. Tsai AC, editor. PLoS Med. 2016 Nov  
523 8;13(11):e1002166.
- 524 28. Adia AC, Ng MJ, Quilantang MI, Restar AJ, Hernandez LI, Imperial RH, et al. Collective  
525 Coping Strategies for HIV-Related Challenges Among Men Who Have Sex With Men in  
526 Manila, Philippines. AIDS Education and Prevention. 2019 Oct;31(5):479–90.
- 527 29. Kombo BK, Thomann M, Lazarus L, Musyoki H, Olango K, Kuria S, et al. Engaging MSM  
528 Communities in HIV Self-Testing Research and Programming in Kenya: Collaborations,  
529 Tacit Knowledge, and a Community-Based Programme Science Approach [Internet]. In  
530 Review; 2021 Oct [cited 2022 Jul 24]. Available from:  
531 <https://www.researchsquare.com/article/rs-861094/v2>
- 532 30. Tang W, Ritchwood TD, Wu D, Ong JJ, Wei C, Iwelunmor J, et al. Crowdsourcing to  
533 Improve HIV and Sexual Health Outcomes: a Scoping Review. Curr HIV/AIDS Rep. 2019  
534 Aug 1;16(4):270–8.
- 535
- 536

Figure 1 Study Procedures

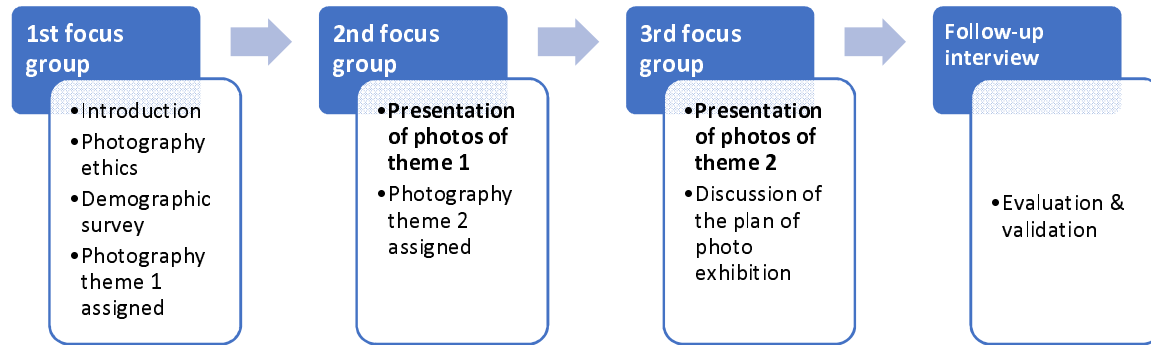

Image and Caption 1.

(The photo has been removed due to the inclusion of Chinese language content. Please contact the corresponding author to request access to this information.)

A cover of the book *Covering: The Hidden Assault on Our Civil Rights* by **Stephen**

Image and Caption 2.

(The photos have been removed due to the inclusion of Chinese language content. Please contact the corresponding author to request access to this information.)

“Roommate's blood donation certificate” by **Stephen**

Image and Caption 3.

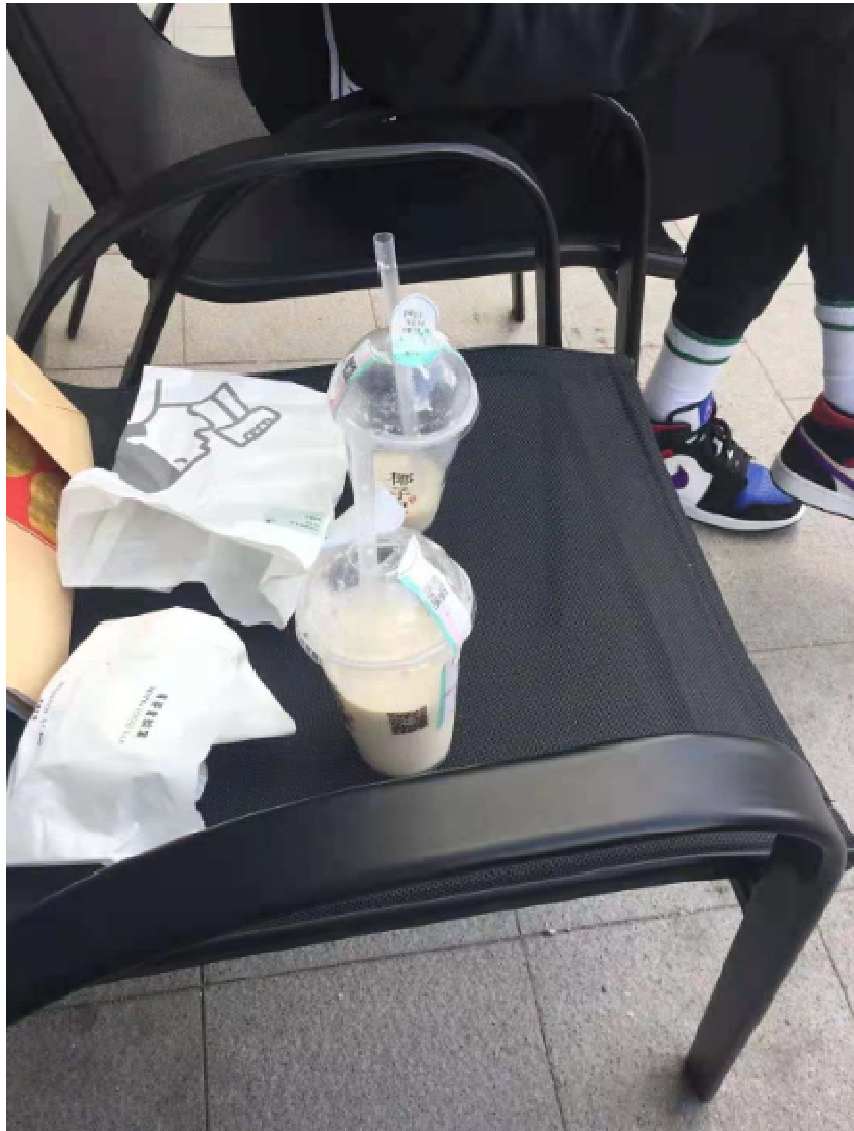

“The friend beside me is diagnosed with HIV, but we often hang out for food. It turns out that it is absolutely not contagious through daily contact.” by Carey.

#### Image and Caption 4.

(The photo has been removed due to the inclusion of Chinese language content. Please contact the corresponding author to request access to this information.)

“HIV Self-testing in the dormitory on campus at night. --Regular self-testing released my fear [of infection]. Do not fear, do protect your body, do early tests and early treatment”. **By Xiaoli**

Image and Caption 5.

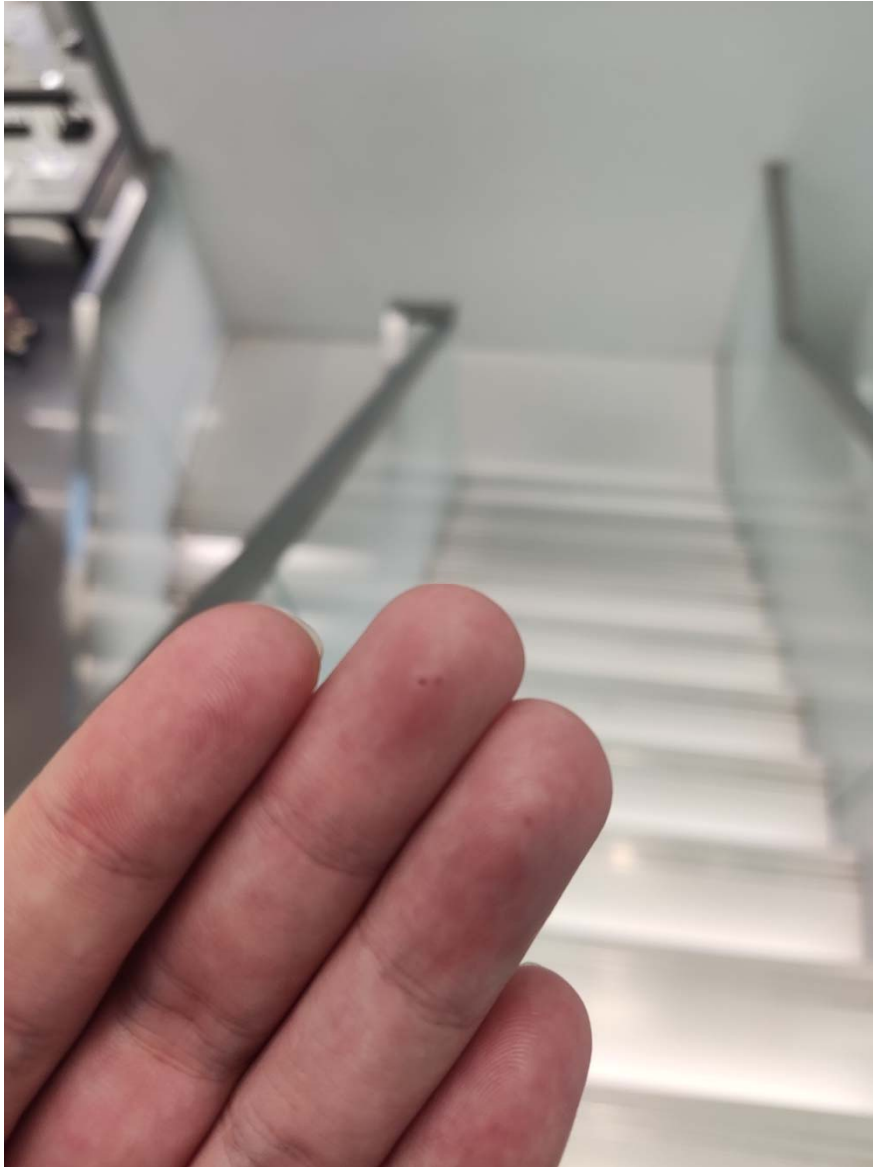

“Frequent self-testing brought me three pinholes. That is my anxiety”. **By Ririyeye**

Image and Caption 6.

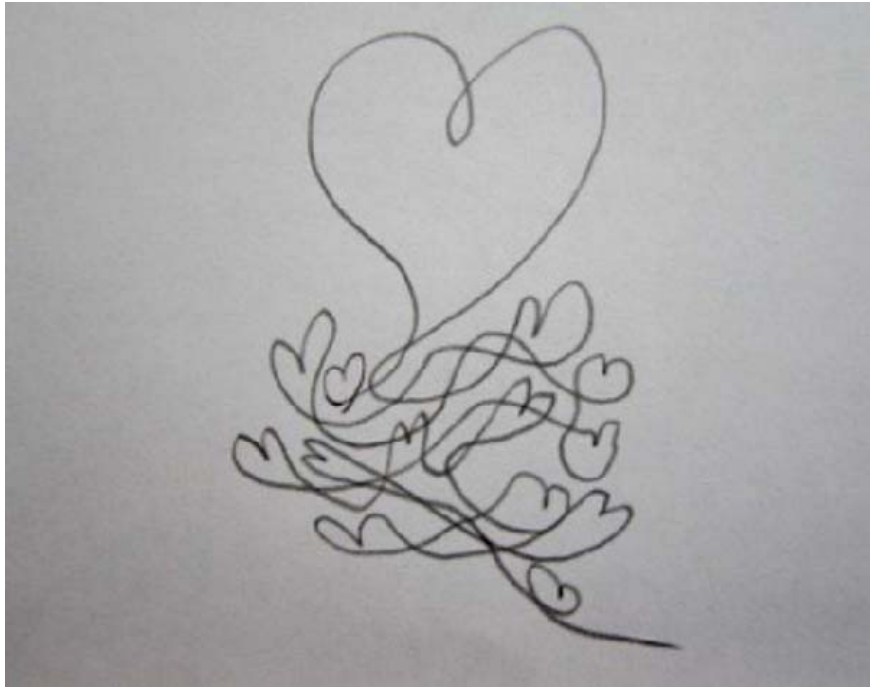

“My own painting – our [we and alters] hearts are connected.” **By Qian**



## Image and Caption 7.

(The photo has been removed due to the inclusion of Chinese language content. Please contact the corresponding author to request access to this information.)

[translation -“Hey there.” -“?” -“Nothing.” ]

“In the beginning, I thought there were many people who could be the recipients of the distribution, like online friends on WeChat, strangers on the dating APP, or people you've only met briefly. But as I started to distribute, I realized that I ended up choosing the most understanding friend.” **By Stephen.**

Image and Caption 8.

(The photo has been removed due to the inclusion of Chinese language content. Please contact the corresponding author to request access to this information.)

“Buy one [HIVST kit] get one for free.” **By Lichee**

Image and Caption 9.

(The photo has been removed due to the inclusion of Chinese language content. Please contact the corresponding author to request access to this information.)

“On [a date], volunteered to hand away free lubricants and condoms near a gays-gathering-place.” **By Rainbow**
